# Supplementary material for: CD44 enhances tumor aggressiveness by promoting tumor cell plasticity
Source: PubMed Central journal article supplement (PMC4637310; doi:10.18632/oncotarget.3839), 2015-04-15
Supplement: oncotarget-06-19634-s001.pdf [file oncotarget-06-19634-s001.pdf]

## CD44 enhances tumor aggressiveness by promoting tumor cell plasticity

### Supplementary Material

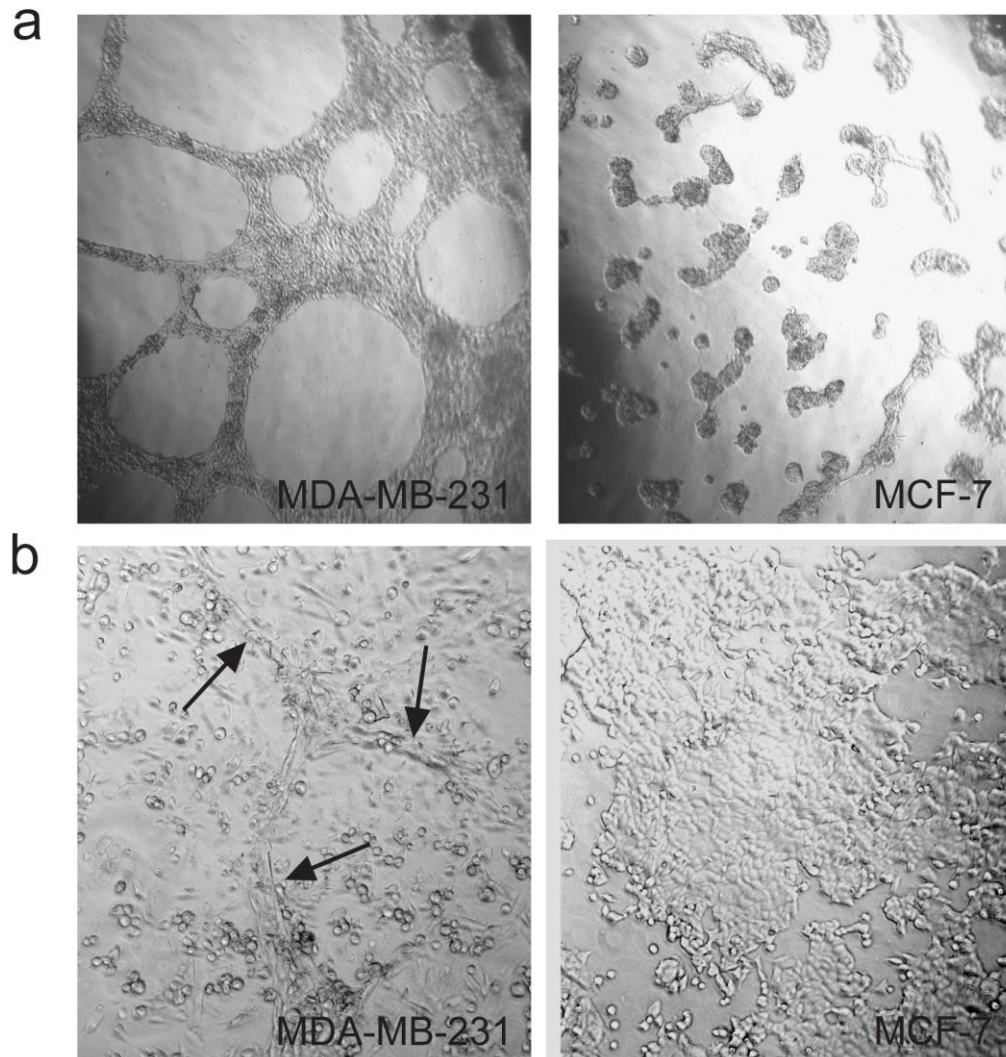

**Supplementary Figure S1:** MDA-MB-231 breast carcinoma cells are capable of VM. **(a)**

MDA-MB-231 cells, in contrast to MCF-7 cells, form tubular patterns when cultured *in vitro* on Matrigel or **(b)** on collagen type I.

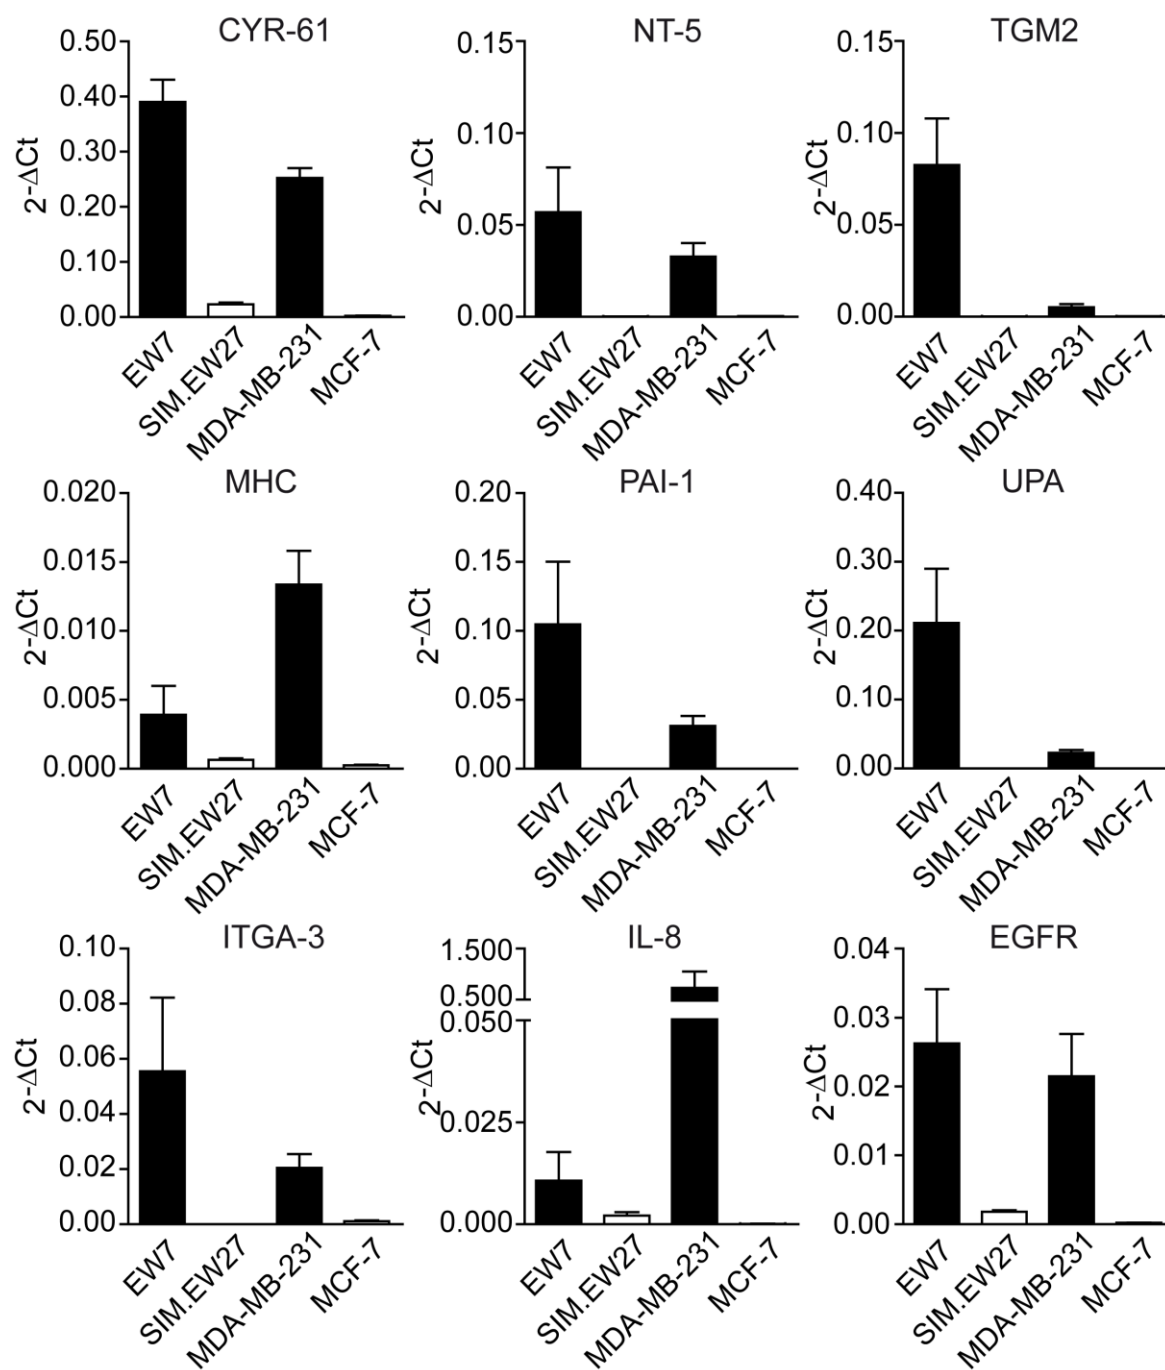

**Supplementary Figure S2:** Validation of microarray. Expression analysis of a selection of genes identified by microarray to be overexpressed by more than 10-fold in both VM<sup>+</sup> Ewing sarcoma (EW7) and breast carcinoma (MDA-MB-231) cell lines as compared to the VM<sup>-</sup> Ewing sarcoma (SIM.EW27) and breast carcinoma (MCF-7).

Supplementary Table S1: Primer sequences.

| <b>Gene</b>   | <b>Forward 5'→3'</b>     | <b>Reverse 5'→3'</b>  |
|---------------|--------------------------|-----------------------|
| β-actin       | GCTGTGCTACGTCGCCCTG      | GGAGGAGCTGGAAGCAGCC   |
| Cyclophilin A | CTCGAATAAGTTTGACTTGTGTTT | CTAGGCATGGGAGGGAACA   |
| CD44s         | GCAGTCAACAGTCGAAGAAGG    | CCGTTGAGTCCACTTGGC    |
| CD44v3        | AAATACCATCTCAGCAGGCT     | TGGTGCTGGAGATAAAATCTT |
| CD44v5        | ATGTAGACAGAAATGGCACCA    | TTGTAGAATGTGGGGTCTCTT |
| CD44v6        | AGTACAACGGAAGAAACAGCTA   | TGTCCCTGTTGTCTGAATGG  |
| CD44v10       | ATAGGAATGATGTCACAGGTGG   | TCCTTCGTGTGTGGGTAATG  |
| PLAUR         | CAGTGCCTGGATGTGA         | AGGAAGTGAAGGTGTCGTT   |
| c-Met         | GATGGCAAGAAAATTCACTGT    | CTTCACTTCGCAGGCAGAT   |
| Villin-2      | ACACTGCCAAGATTGCC        | GTCATCACCAGGTGCAGCT   |
| TIMP1         | AGTGTCTGCGGATACTTCCA     | CTAAGCTCAGCCTGTTCCAG  |
